# Supplementary material for: Satellite and Machine Learning Monitoring of Optically Inactive Water Quality Variability in a Tropical River
Source: MDPI journal article supplement (doi:10.3390/rs14215466), 2022-10-30
Supplement: s1 [file s1]

**Table S1.** Classification standards of water quality levels in GB 3838-2002.

| WQP (mg/L) | Water quality levels |     |     |     |     |
|------------|----------------------|-----|-----|-----|-----|
|            | I                    | II  | III | IV  | V   |
| TN≤        | 0.2                  | 0.5 | 1.0 | 1.5 | 2.0 |
| AN≤        | 0.15                 | 0.5 | 1.0 | 1.5 | 2.0 |
| TP≤        | 0.02                 | 0.1 | 0.2 | 0.3 | 0.4 |

**Table S2.** Statistical information of TN for all regions and seasons.

| Type   | Area | Slope | Intercept | R <sup>2</sup> | p    | N |
|--------|------|-------|-----------|----------------|------|---|
| Normal | All  | 0.00  | 0.82      | 0.00           | 0.98 | 7 |
|        | A    | 0.00  | -5.40     | 0.03           | 0.70 |   |
|        | B    | 0.00  | -7.13     | 0.03           | 0.70 |   |
|        | C    | -0.01 | 14.60     | 0.07           | 0.56 |   |
| Wet    | All  | 0.01  | -24.17    | 0.52           | 0.10 | 6 |
|        | A    | 0.01  | -26.37    | 0.52           | 0.11 |   |
|        | B    | 0.02  | -36.87    | 0.58           | 0.08 |   |
|        | C    | 0.01  | -11.91    | 0.20           | 0.38 |   |

**Table S3.** Statistical information of AN for all regions and seasons.

| Type   | Area | Slope | Intercept | R <sup>2</sup> | p       | N |
|--------|------|-------|-----------|----------------|---------|---|
| Normal | All  | -0.02 | 48.73     | 0.81           | <0.01** | 7 |
|        | A    | -0.01 | 25.48     | 0.59           | 0.04*   |   |
|        | B    | -0.03 | 58.08     | 0.31           | 0.19    |   |
|        | C    | -0.03 | 70.78     | 0.71           | 0.02*   |   |
| Wet    | All  | -0.05 | 99.99     | 0.76           | 0.02*   | 6 |
|        | A    | -0.04 | 71.95     | 0.69           | 0.04*   |   |
|        | B    | -0.07 | 146.58    | 0.63           | 0.06    |   |
|        | C    | -0.05 | 99.04     | 0.77           | 0.02*   |   |

Note, \* p < 0.05, \*\* p < 0.01

**Table S4.** Statistical information of TP for all regions and seasons.

| Type   | Area | Slope | Intercept | R <sup>2</sup> | p     | N |
|--------|------|-------|-----------|----------------|-------|---|
| Normal | All  | -0.00 | 2.29      | 0.26           | 0.25  | 7 |
|        | A    | -0.00 | 4.55      | 0.75           | 0.01* |   |
|        | B    | -0.00 | 2.02      | 0.20           | 0.32  |   |
|        | C    | 0.00  | -0.37     | 0.01           | 0.88  |   |
| Wet    | All  | -0.00 | 4.69      | 0.36           | 0.21  | 6 |
|        | A    | -0.00 | 2.97      | 0.18           | 0.40  |   |
|        | B    | -0.00 | 3.31      | 0.19           | 0.39  |   |
|        | C    | -0.00 | 7.95      | 0.55           | 0.09  |   |

Note, \* p < 0.05

**Table S5.** Statistical information of RFR for TN compare with previous regression equations in the testing dataset.

| ID | Equations                                            | Area               | References | Slope | Intercept | R <sup>2</sup> | p    | RMSE (mg/L) | MAPE (%) |
|----|------------------------------------------------------|--------------------|------------|-------|-----------|----------------|------|-------------|----------|
| 1  | TN=0.233*(B4-B1) <sup>2</sup> +1.2714*(B4-B1)+1.3499 | Poyang lack, China | [1]        | 0.01  | 1.37      | 0.08           | 0.24 | 0.50        | 61.59    |

|   |                                                                             |                      |     |       |      |      |       |      |        |
|---|-----------------------------------------------------------------------------|----------------------|-----|-------|------|------|-------|------|--------|
| 2 | $TN=0.5914 \times (B5+B2)+1.1997$                                           | Dongting lake, China |     | 0.02  | 1.23 | 0.08 | 0.24  | 0.44 | 52.41  |
| 3 | $TN=-3.219 \times (B3-B7)+5.712$                                            | Taihu lake, China    |     | -0.06 | 5.68 | 0.32 | 0.01* | 4.54 | 534.00 |
| 4 | $TN=-0.1 \times ((B5-B7)/(-1335.5))^2-0.66 \times ((B5-B7)/(-1335.5))+1.45$ | Yangtze River, China | [2] | 0.00  | 1.45 | 0.00 | 0.82  | 0.55 | 67.85  |
| 5 | $TN=2.89-20.054 \times B3+15.137 \times B4+8.257 \times B5$                 | Nakdong River, Korea | [3] | -0.02 | 2.94 | 0.00 | 0.88  | 1.88 | 229.74 |
| 6 | $TN=2.492-1.134 \times B4+7.257 \times B5$                                  | Nakdong River, Korea |     | 0.04  | 2.80 | 0.01 | 0.76  | 1.81 | 220.10 |

Note, \*  $p < 0.05$

**Table S6.** Statistical information of ANN for TP compare with previous regression equations in the testing dataset.

| ID | Equations                                                                  | Area                 | References | Slope  | Intercept | $R^2$ | $p$   | RMSE (mg/L) | MAPE (%) |
|----|----------------------------------------------------------------------------|----------------------|------------|--------|-----------|-------|-------|-------------|----------|
| 1  | $TP=0.0038 \times ((B4-B3)/B5)^2+0.0146 \times (B4-B3)/B5+0.0772$          | Dongting lake, China | [1]        | 0.01   | 0.07      | 0.02  | 0.60  | 0.05        | 74.71    |
| 2  | $TP=0.0292 \times (B5/B1)^2+0.0979 \times (B5/B1)+0.0332$                  | Taihu lake, China    |            | -14.99 | 2.55      | 0.11  | 0.19  | 2.56        | 4125.00  |
| 3  | $TP=0.0577 \times ((B4+B6+B7)/3)^2+0.707 \times ((B4+B6+B7)/3)+0.0735$     | Yangtze River, China | [2]        | 0.16   | 0.09      | 0.25  | 0.04* | 0.05        | 104.84   |
| 4  | $TP=0.063-0.022 \times B2+0.015 \times B3+0.005 \times B4-0.166 \times B5$ | Nakdong River, Korea | [3]        | -0.03  | 0.06      | 0.05  | 0.39  | 0.05        | 54.92    |
| 5  | $TP=0.06+0.041 \times B3-0.209 \times B5+0.003 \times (B5/B3)$             | Nakdong River, Korea |            | -0.03  | 0.06      | 0.08  | 0.26  | 0.05        | 55.41    |
| 6  | $TP=0.043+0.152 \times B3-0.168 \times B5$                                 | Nakdong River, Korea |            | 0.02   | 0.04      | 0.03  | 0.48  | 0.06        | 44.61    |

Note, \*  $p < 0.05$

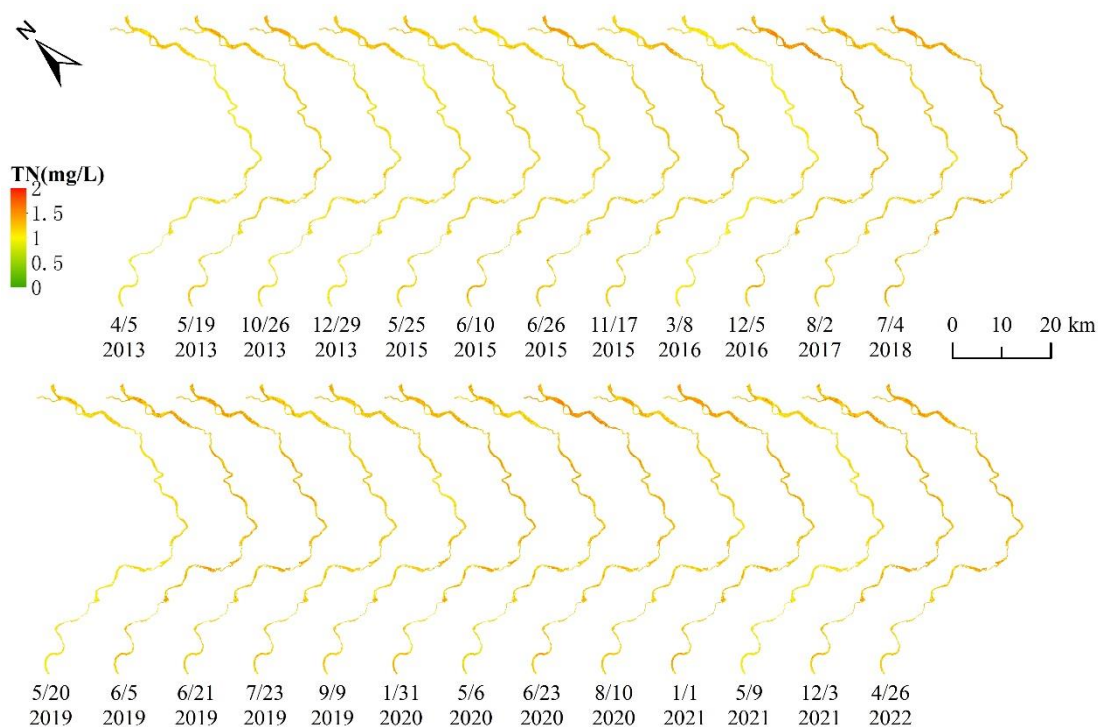

**Figure S1.** The spatial distribution of TN in NRD.

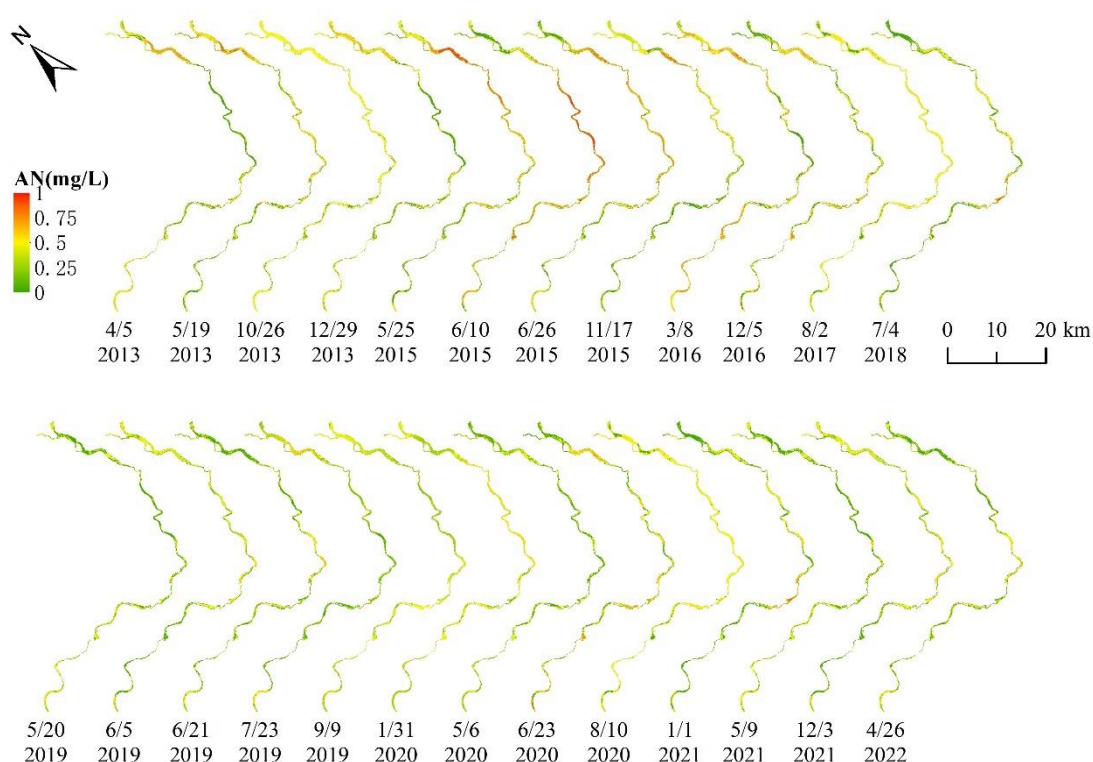

**Figure S2.** The spatial distribution of AN in NRD.

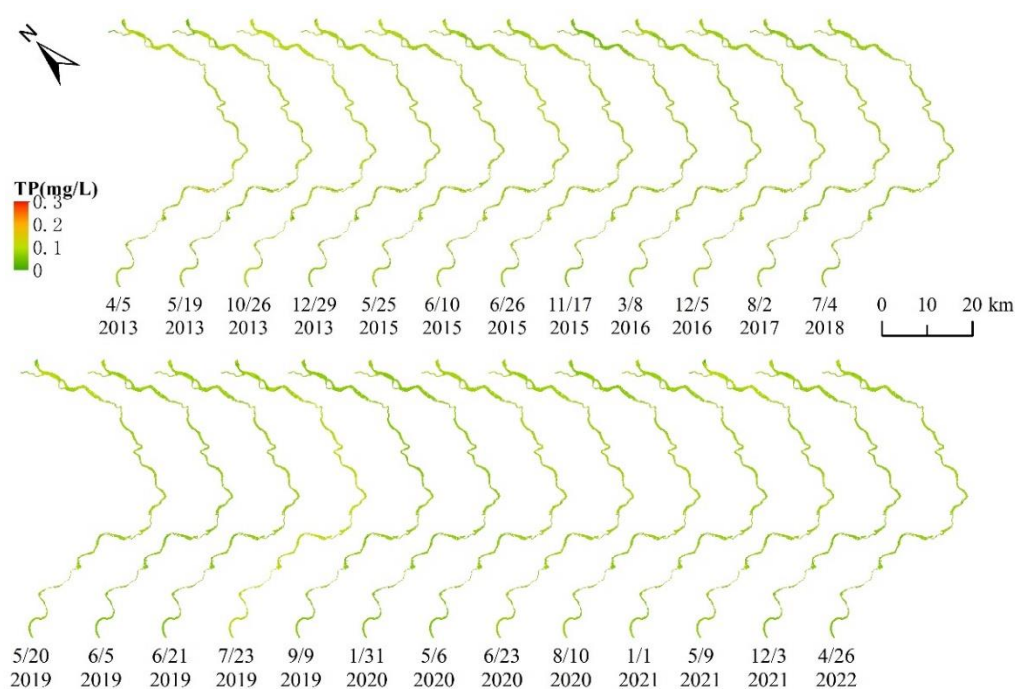

**Figure S3.** The spatial distribution of TP in NRD.

## References

1. Shang W, Jin S, He Y, Zhang Y, Li J. Spatial–Temporal Variations of Total Nitrogen and Phosphorus in Poyang, Dongting and Taihu Lakes from Landsat-8 Data. *Water*, **2021**, *13*, 10.3390/w13121704.
2. He Y, Jin S, Shang W. Water Quality Variability and Related Factors along the Yangtze River Using Landsat-8. *Remote Sensing*, **2021**, *13*, 10.3390/rs13122241.
3. Lim J, Choi M. Assessment of water quality based on Landsat 8 operational land imager associated with human activities in Korea. *Environ Monit Assess*, **2015**, *187*, 384. 10.1007/s10661-015-4616-1.
